# Supplementary material for: Admission of patients with STEMI since the outbreak of the COVID-19 pandemic: a survey by the European Society of Cardiology
Source: Oxford University Press journal article supplement (doi:10.1093/ehjqcco/qcaa046), 2020-05-23
Supplement: qcaa046_supplementary_data.docx [file qcaa046_supplementary_data.docx]

**Supplementary material - Survey of the European Society of Cardiology on admission of patients with STEMI since the outbreak of the COVID-19 pandemic**

**Annex 1 -** **Survey structure**

**Are you a:**

1. Cardiologist

2. Interventional cardiologist

3. Population health scientists

4. Nurse or allied health professional

5. Basic Scientist (stop question – end of questionnaire – thank you)

**Where are you based?**

Country - text box

Region - text box

**Where do you work?**

1. Regional/District/Local Hospital

2. University Hospital

3. Private Hospital

4. Clinics / Outpatients (stop question – end of questionnaire – thank you)

**Is your country in “lockdown” (e.g. most shops and restaurants are closed, people work from home as much as possible)?**

1. Yes

2. No

3. Partially

**Have you perceived a change in the number of people coming to your hospital with STEMI since the coronavirus outbreak (COVID-19)?**

1. Yes, the amount has decreased

2. Yes, the amount has increased

3. No, the amount hasn't changed (stop question – end of questionnaire – thank you)

4. I don't know (stop question - end of questionnaire – thank you)

---------------------------------------------------

**If answered 1**.

**To the best of your knowledge, by how much has the number of people coming to your hospital with STEMI decreased since the coronavirus outbreak (COVID-19)?**

1. It has decreased by less than 20%

2. It has decreased by 20-39%

3. It has decreased by 40-59%

4. It has decreased by 60-79%

5. It has decreased by more than 80%

6. I don't know

**Do STEMI patients present later than usual (i.e. beyond the optimal window for PCI/thrombolysis)?**

1. No

2. Yes, 10-19 % of them do

3. Yes, 20-39 % of them do

4. Yes, 40-50 % of them do

5. Yes, more than 50% of them do

6. I don't know

**If answered 2**

**To the best of your knowledge, by how much has the number of people coming to your hospital with STEMI increased since the coronavirus outbreak (COVID-19)?**

1. By less than 20%

2. By 20-39%

3. By 40-59%

4. By 60-79%

5. By more than 80%

6. I don't know

**Why do you think there has been an increase in patients coming to your hospital with STEMI? Please select all that apply.**

1. Health anxiety

2. More STEMIs are happening

3. There have been more STEMI presentations with normal coronaries than usual

4. I don't know

5. Other (text box)

**Do STEMI patients present later than usual (i.e. beyond the window for PCI/thrombolysis)?**

1. No

2. Yes, 10-19 % of them do

3. Yes, 20-39 % of them do

4. Yes, 39-50 % of them do

5. Yes, more than 50% of them do

6. I don’t know

---------------------------------------------------

**How many patients are currently admitted to your hospital because of COVID-19?**

1. <10 or none

2. 10-50

3. 50-100

4. 100-200

5. >200

6. I don't know

**Has your ward/unit/department been restructured as a result of the COVID-19 pandemic?**

1. No
2. Partially
3. Totally

**Annex 2 - Data for Europe and the Four European Regions**

Characteristics of the Responders

Work place

Is your country in “lockdown” (e.g. most shops and restaurants are closed, people work from home as much as possible)?

Have you perceived a change in the number of people coming to your hospital with STEMI since the coronavirus outbreak (COVID-19)?

To the best of your knowledge, by how much has the number of people coming to your hospital with STEMI decreased since the coronavirus outbreak (COVID-19)?

|  |
| --- |

To the best of your knowledge, by how much has the number of people coming to your hospital with STEMI increased since the coronavirus outbreak (COVID-19)?

*(this analysis is limited by the low number of responders who thought that the STEMI admissions were increased)*

Why do you think there has been an increase in patients coming to your hospital with STEMI? Please select all that apply.

*(this analysis is limited by the low number of responders who thought that the STEMI admissions were increased)*

Do STEMI patients present later than usual (i.e. beyond the optimal window for PCI/thrombolysis)?

Percentage of STEMI patients presenting later than usual

How many patients are currently admitted to your hospital because of COVID-19?

Has your ward/unit/department been restructured as a result of the COVID-19 pandemic?
